# Supplementary material for: Supramolecular interactions induced distortion of BTB ligands: breaking convention to reproduce an unusual (3,4,4)-connected MOF topology
Source: Royal Society of Chemistry journal article supplement (doi:10.1039/c9dt00233b), 2019-01-01
Supplement: c9dt00233b1.pdf [file c9dt00233b1.pdf]

**Electronic Supplementary Information (ESI)**

**Supramolecular interactions induced distortion of BTB ligands:  
breaking convention to reproduce the unusual (3, 4, 4)-connected MOF  
topology**

Jiantang Li, Jiaming Gu, Lirong Zhang and Yunling Liu\*

*State Key Laboratory of Inorganic Synthesis and Preparative Chemistry, College of  
Chemistry, Jilin University, Changchun 130012, P. R. China.*

*E-mail: yunling@jlu.edu.cn; Fax: +86-431-85168624; Tel: +86-431-85168614*

## Section 1. Materials and Methods

All of the chemicals were obtained from commercial channels and used without further purification. Powder X-ray diffraction (PXRD) data was tested on a Rigaku D/max-2550 diffractometer (Cu-K $\alpha$  radiation,  $\lambda = 1.5418 \text{ \AA}$ ). Elemental analyses (C, H, and N) were collected by a vario MICRO (Elementar, Germany). The thermal gravimetric analyses (TGA) were performed on a TGA Q500 thermogravimetric analyzer (air, heating rate of  $10 \text{ }^\circ\text{C min}^{-1}$ ).

### Synthesis of JLU-MOF59

A solid mixture of H<sub>3</sub>BTB (0.015 g, 0.034 mmol), CuCl<sub>2</sub>·2H<sub>2</sub>O (0.01 g, 0.059 mmol), NMF (5 mL), EtOH (2.5 mL), and HNO<sub>3</sub> (1.5 mL) (2.2 mL HNO<sub>3</sub> in 10 mL DMF) were sealed in a 20 mL vial and then heated at 85 °C for 12 h. Green block crystals were collected and washed with NMF (62% yield based on CuCl<sub>2</sub>·2H<sub>2</sub>O). Elemental analysis (wt %) for **JLU-MOF59**: calculated: C, 55.40; H, 4.750; N, 5.580, found: C, 54.96; H, 4.872; N, 5.641.

## Section 2. Supporting structure information of JLU-MOF59

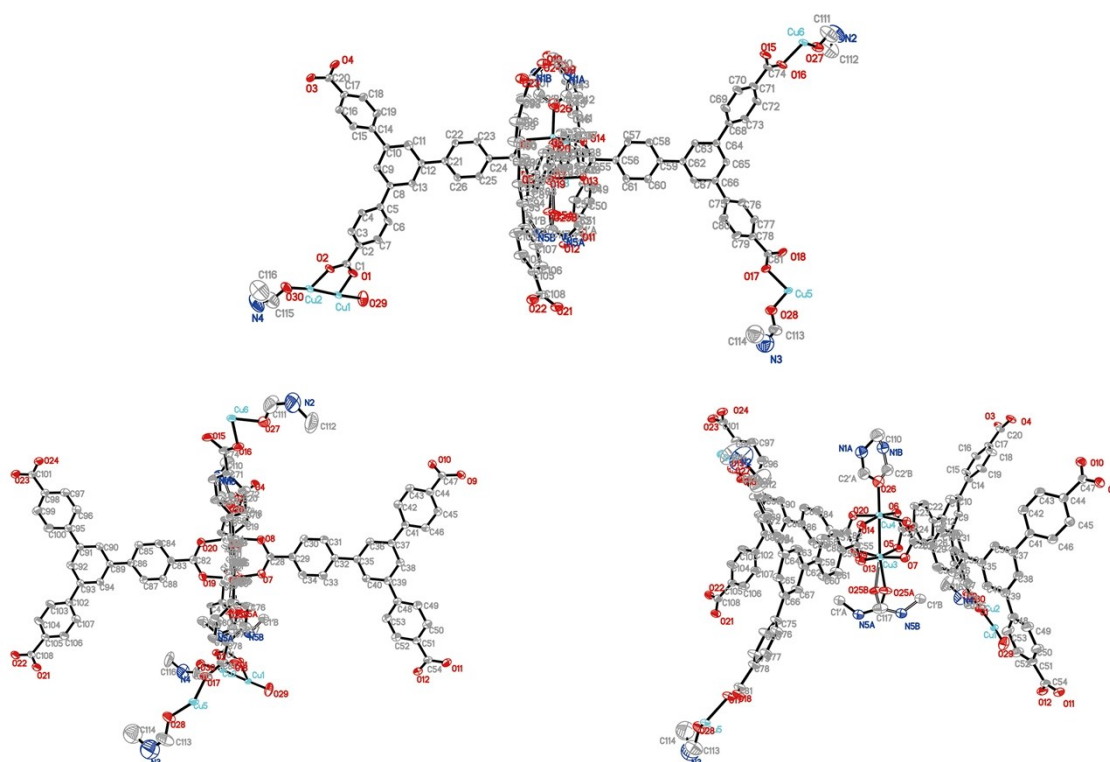

**Figure S1** Thermal ellipsoid (30%) plot of the non-hydrogen bonded framework of **JLU-MOF59** via three different directions.

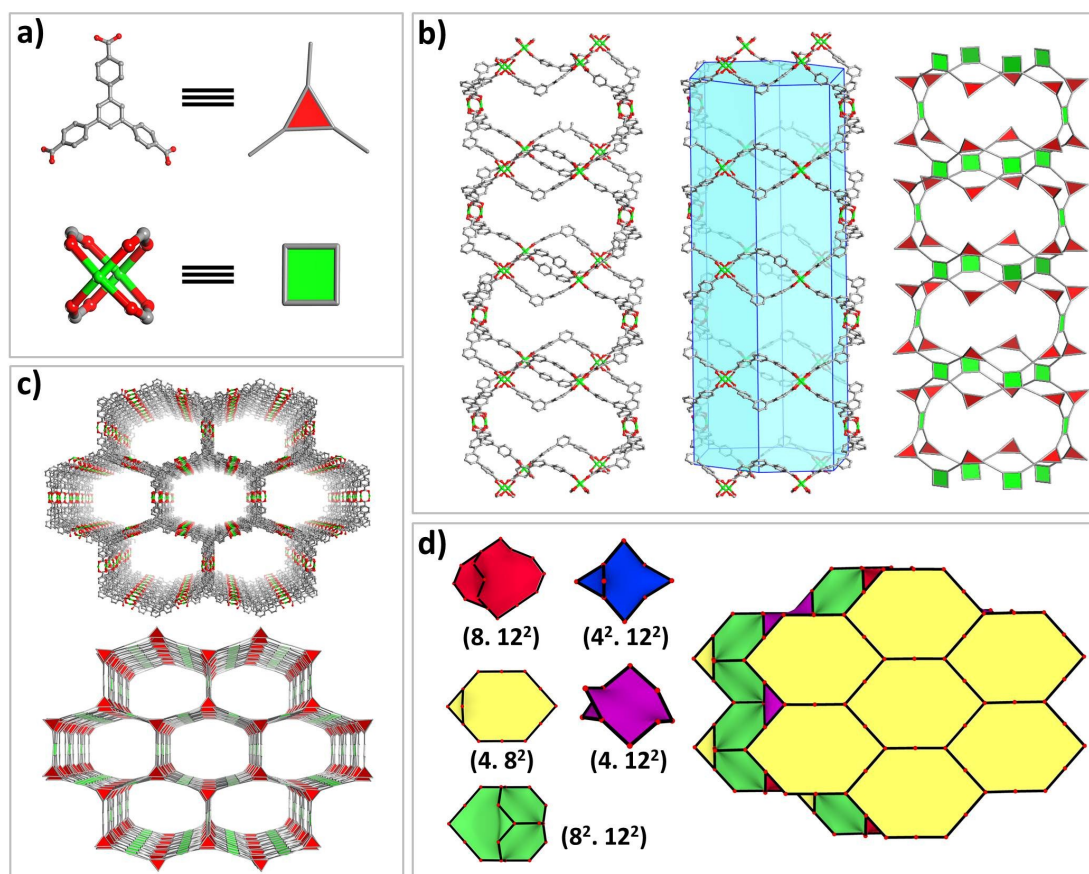

**Figure S2** Description of the non-interpenetrated structure of **JLU-MOF59**: (a) Cu paddlewheel SBUs viewed as a 4-c node, and organic BTB<sup>3-</sup> ligand viewed as a 3-n node; (b) hexagonal 1D straight channel; (c) ball and stick model of the 3D framework and polyhedral view of the net; (d) topological features of the compound displayed by tiling.

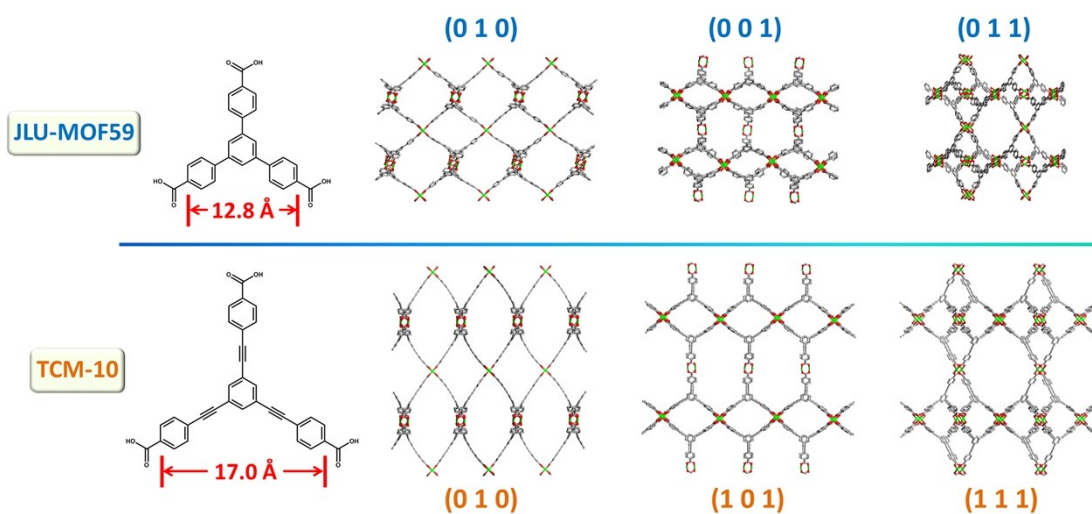

**Figure S3** Comparison of **JLU-MOF59** and **TCM-10** in ligand size and different directions.<sup>1</sup>

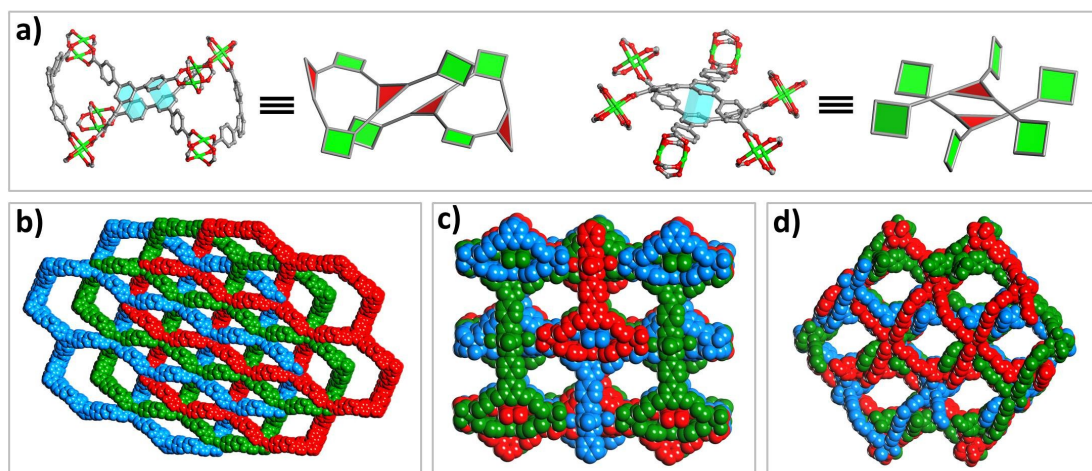

**Figure S4** Description of the interpenetrated structure of **JLU-MOF59**: (a) polyhedral view of the two different  $\pi$ - $\pi$  interactions; (b, c, d) CPK models in three different directions.

### Section 3. PXRD and TGA data

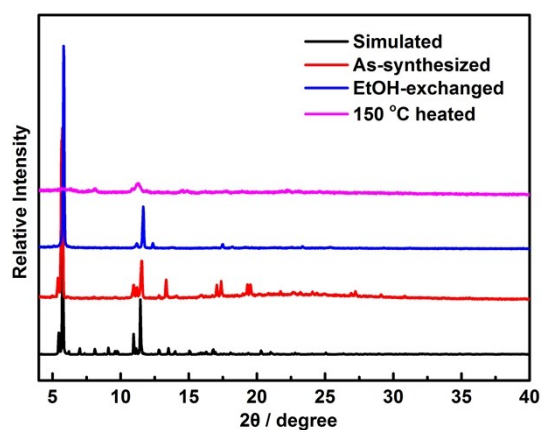

**Figure S5** PXRD patterns of **JLU-MOF59** for simulated, as-synthesized, EtOH-exchanged and 150 °C heated samples.

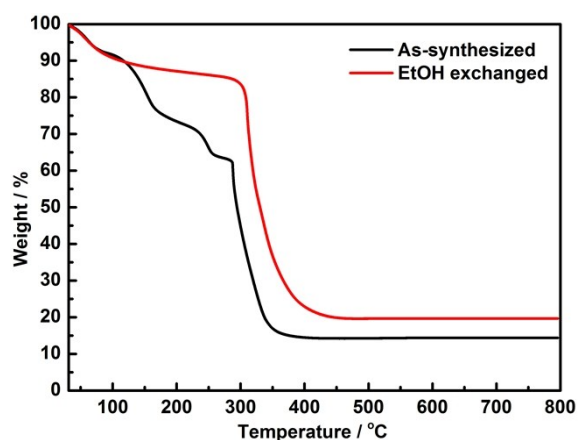

**Figure S6** TGA curves of **JLU-MOF59** for the as-synthesized and EtOH-exchanged samples.

## Section 4. Gas sorption measurements

BET surface area was measured by N<sub>2</sub> adsorption isotherms at 77 K with a Micrometrics ASAP 2420 instrument. MOF supercritical CO<sub>2</sub> activation was performed using a Tousimis™ Samdri® PVT-3D critical point dryer (Tousimis, Rockville, MD, USA).

### Activation procedures:

Fresh absolute EtOH was used to exchange the NMF molecules with EtOH. The solvent exchange was repeated three times daily for three days. This sample was subjected to supercritical carbon dioxide drying procedure.<sup>2</sup> Liquid CO<sub>2</sub> was used to exchange the EtOH, the system was vented 6 times over the course of 18 hours to fully exchange the EtOH with CO<sub>2</sub>. The system was then bled at the rate of 0.2 cc/s. Subsequently the samples were transferred into a sorption tube and dried on an activation port of an ASAP 2420 under dynamic vacuum at 50 °C for 10 h.

### BET calculation:

The conditions for calculating the BET surface area are satisfied at five points between  $P/P_0 = 0.05$  to 0.13 before the occurrence of the sudden increase. As shown in Figure S7, the 5 points showed an excellent linear relationship ( $R^2 > 0.999$ ).

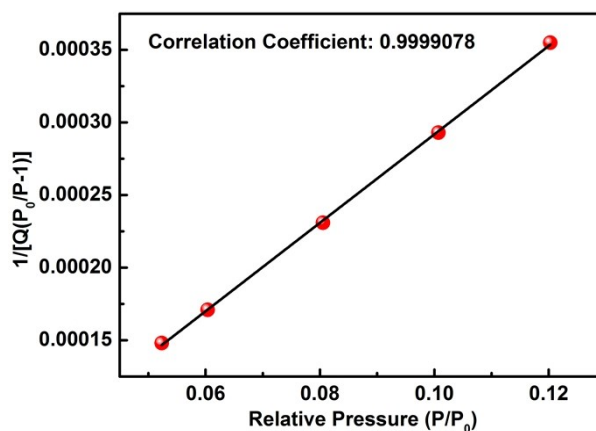

Figure S7 The linear fitting curve for calculating BET surface areas of JLU-MOF59.

## Section 4. X-ray crystallography and structure information

JLU-MOF59 was collected on a Bruker D8 Venture diffractometer using graphite-monochromated Mo-K $\alpha$  ( $\lambda = 0.71073 \text{ \AA}$ ) radiation at room temperature to obtain the crystallographic data. The structure of JLU-MOF59 was solved by direct methods and refined by full-matrix least-squares on  $F^2$  using SHELXL-2014.<sup>3</sup> All the metal atoms were located first, and then the oxygen, carbon and nitrogen of the compound were subsequently found in difference Fourier maps. The hydrogen atoms of the ligand were placed geometrically. All non-hydrogen atoms were refined anisotropically. For

there were lots of disordered solvent molecules in the structure, the PLATON/SQUEEZE was applied to remove their diffraction contribution.<sup>4</sup> The final formula was derived from crystallographic data combined with elemental and thermogravimetric analysis data. The detailed crystallographic data and selected bond lengths and angles for **JLU-MOF59** are listed in Table S2-S3, respectively. Topology information for **JLU-MOF59** was calculated by TOPOS 4.0.<sup>5</sup>

**Table S2.** Crystal data and structure refinements for **JLU-MOF59**.

| Compound                                                                    | <b>JLU-MOF59</b>                                                                    |
|-----------------------------------------------------------------------------|-------------------------------------------------------------------------------------|
| Formula                                                                     | C <sub>139</sub> H <sub>143</sub> Cu <sub>6</sub> N <sub>12</sub> O <sub>40.5</sub> |
| <i>M<sub>w</sub></i>                                                        | 3010.89                                                                             |
| Temp (K)                                                                    | 297(2)                                                                              |
| Wavelength (Å)                                                              | 0.71073                                                                             |
| Crystal system                                                              | Monoclinic                                                                          |
| Space group                                                                 | C2/c                                                                                |
| <i>a</i> (Å)                                                                | 32.634(4)                                                                           |
| <i>b</i> (Å)                                                                | 30.916(3)                                                                           |
| <i>c</i> (Å)                                                                | 39.284(4)                                                                           |
| $\alpha$ (°)                                                                | 90                                                                                  |
| $\beta$ (°)                                                                 | 109.930(4)                                                                          |
| $\gamma$ (°)                                                                | 90                                                                                  |
| <i>V</i> (Å <sup>3</sup> )                                                  | 37260(7)                                                                            |
| <i>Z</i> , <i>D<sub>c</sub></i> (Mg/m <sup>3</sup> )                        | 8, 1.073                                                                            |
| <i>F</i> (000)                                                              | 12472                                                                               |
| $\theta$ range (deg)                                                        | 2.335 - 25.087                                                                      |
| reflns collected/unique                                                     | 198375 / 32937                                                                      |
| <i>R<sub>int</sub></i>                                                      | 0.0793                                                                              |
| data/restraints/params                                                      | 32937 / 2862 / 1458                                                                 |
| GOF on <i>F</i> <sup>2</sup>                                                | 1.087                                                                               |
| <i>R</i> <sup>1</sup> , <i>wR</i> <sup>2</sup> ( <i>I</i> > 2σ( <i>I</i> )) | 0.0662, 0.1999                                                                      |
| <i>R</i> <sup>1</sup> , <i>wR</i> <sup>2</sup> (all data)                   | 0.1009, 0.2217                                                                      |

Due to the presence of a highly disordered NMF molecule, we were unable to accurately add hydrogen atoms to it, so there is “Alert level B” about “H-atoms Missing” appeared. However, the number of hydrogen atoms is calculated into the molecular formula.

**Table S3.** Selected bond lengths [Å] and angles [°] for **JLU-MOF59**.

| JLU-MOF59     |            |                       |            |
|---------------|------------|-----------------------|------------|
| Cu(1)-O(11)#1 | 1.950(4)   | O(19)-Cu(3)-O(25B)    | 88.3(3)    |
| Cu(1)-O(10)#2 | 1.957(4)   | O(5)-Cu(3)-O(25B)     | 99.8(4)    |
| Cu(1)-O(3)#3  | 1.971(3)   | O(7)-Cu(3)-O(25B)     | 103.9(3)   |
| Cu(1)-O(1)    | 1.983(3)   | O(13)-Cu(3)-O(25B)    | 90.9(4)    |
| Cu(1)-O(29)   | 2.169(4)   | O(19)-Cu(3)-Cu(4)     | 84.38(10)  |
| Cu(1)-Cu(2)   | 2.6218(8)  | O(5)-Cu(3)-Cu(4)      | 83.94(9)   |
| Cu(4)-O(20)   | 1.970(3)   | O(7)-Cu(3)-Cu(4)      | 83.37(10)  |
| Cu(4)-O(14)   | 1.974(3)   | O(13)-Cu(3)-Cu(4)     | 85.27(10)  |
| Cu(4)-O(8)    | 1.985(3)   | O(25A)-Cu(3)-Cu(4)    | 171.1(3)   |
| Cu(4)-O(6)    | 1.989(3)   | O(25B)-Cu(3)-Cu(4)    | 171.8(3)   |
| Cu(4)-O(26)   | 2.134(5)   | O(2)-Cu(2)-O(4)#3     | 170.95(15) |
| Cu(4)-Cu(3)   | 2.6250(7)  | O(2)-Cu(2)-O(12)#1    | 91.63(16)  |
| Cu(3)-O(19)   | 1.950(3)   | O(4)#3-Cu(2)-O(12)#1  | 87.87(17)  |
| Cu(3)-O(5)    | 1.950(3)   | O(2)-Cu(2)-O(9)#2     | 87.45(15)  |
| Cu(3)-O(7)    | 1.952(3)   | O(4)#3-Cu(2)-O(9)#2   | 90.73(16)  |
| Cu(3)-O(13)   | 1.957(3)   | O(12)#1-Cu(2)-O(9)#2  | 165.23(16) |
| Cu(3)-O(25A)  | 2.170(11)  | O(2)-Cu(2)-O(30)      | 94.70(15)  |
| Cu(3)-O(25B)  | 2.176(8)   | O(4)#3-Cu(2)-O(30)    | 94.35(16)  |
| Cu(2)-O(2)    | 1.961(3)   | O(12)#1-Cu(2)-O(30)   | 91.75(18)  |
| Cu(2)-O(4)#3  | 1.967(3)   | O(9)#2-Cu(2)-O(30)    | 103.02(17) |
| Cu(2)-O(12)#1 | 1.970(4)   | O(2)-Cu(2)-Cu(1)      | 87.90(10)  |
| Cu(2)-O(9)#2  | 1.975(3)   | O(4)#3-Cu(2)-Cu(1)    | 83.08(11)  |
| Cu(2)-O(30)   | 2.133(4)   | O(12)#1-Cu(2)-Cu(1)   | 81.79(12)  |
| Cu(6)-O(16)   | 1.954(3)   | O(9)#2-Cu(2)-Cu(1)    | 83.45(11)  |
| Cu(6)-O(23)#4 | 1.960(4)   | O(30)-Cu(2)-Cu(1)     | 173.11(13) |
| Cu(6)-O(24)#5 | 1.970(4)   | O(16)-Cu(6)-O(23)#4   | 87.12(17)  |
| Cu(6)-O(15)#6 | 1.971(3)   | O(16)-Cu(6)-O(24)#5   | 89.84(17)  |
| Cu(6)-O(27)   | 2.155(4)   | O(23)#4-Cu(6)-O(24)#5 | 168.26(16) |
| Cu(6)-Cu(6)#6 | 2.6237(12) | O(16)-Cu(6)-O(15)#6   | 168.77(15) |
| Cu(5)-O(21)#4 | 1.959(4)   | O(23)#4-Cu(6)-O(15)#6 | 91.82(17)  |
| Cu(5)-O(17)   | 1.969(3)   | O(24)#5-Cu(6)-O(15)#6 | 88.96(17)  |
| Cu(5)-O(22)#7 | 1.969(3)   | O(16)-Cu(6)-O(27)     | 97.43(15)  |
| Cu(5)-O(18)#8 | 1.974(3)   | O(23)#4-Cu(6)-O(27)   | 100.16(17) |
| Cu(5)-O(28)   | 2.159(4)   | O(24)#5-Cu(6)-O(27)   | 91.47(17)  |
| Cu(5)-Cu(5)#8 | 2.6188(12) | O(15)#6-Cu(6)-O(27)   | 93.76(15)  |
| O(18)-Cu(5)#8 | 1.974(3)   | O(16)-Cu(6)-Cu(6)#6   | 87.30(11)  |
| O(15)-Cu(6)#6 | 1.971(3)   | O(23)#4-Cu(6)-Cu(6)#6 | 87.11(11)  |
| O(23)-Cu(6)#4 | 1.960(4)   | O(24)#5-Cu(6)-Cu(6)#6 | 81.42(12)  |
| O(24)-Cu(6)#9 | 1.970(4)   | O(15)#6-Cu(6)-Cu(6)#6 | 81.48(11)  |
| O(21)-Cu(5)#4 | 1.959(4)   | O(27)-Cu(6)-Cu(6)#6   | 171.48(12) |

|                       |            |                       |            |
|-----------------------|------------|-----------------------|------------|
| O(22)-Cu(5)#1         | 1.969(3)   | O(21)#4-Cu(5)-O(17)   | 88.14(17)  |
| O(3)-Cu(1)#10         | 1.971(3)   | O(21)#4-Cu(5)-O(22)#7 | 168.88(16) |
| O(4)-Cu(2)#10         | 1.967(3)   | O(17)-Cu(5)-O(22)#7   | 90.37(16)  |
| O(10)-Cu(1)#2         | 1.957(4)   | O(21)#4-Cu(5)-O(18)#8 | 90.63(16)  |
| O(9)-Cu(2)#2          | 1.975(3)   | O(17)-Cu(5)-O(18)#8   | 168.82(15) |
| O(11)-Cu(1)#7         | 1.950(4)   | O(22)#7-Cu(5)-O(18)#8 | 88.69(16)  |
| O(12)-Cu(2)#7         | 1.970(4)   | O(21)#4-Cu(5)-O(28)   | 101.05(17) |
| O(11)#1-Cu(1)-O(10)#2 | 171.55(16) | O(17)-Cu(5)-O(28)     | 96.70(15)  |
| O(11)#1-Cu(1)-O(3)#3  | 87.43(15)  | O(22)#7-Cu(5)-O(28)   | 90.07(17)  |
| O(10)#2-Cu(1)-O(3)#3  | 89.28(16)  | O(18)#8-Cu(5)-O(28)   | 94.43(15)  |
| O(11)#1-Cu(1)-O(1)    | 92.31(16)  | O(21)#4-Cu(5)-Cu(5)#8 | 85.82(11)  |
| O(10)#2-Cu(1)-O(1)    | 88.95(16)  | O(17)-Cu(5)-Cu(5)#8   | 85.35(11)  |
| O(3)#3-Cu(1)-O(1)     | 165.60(15) | O(22)#7-Cu(5)-Cu(5)#8 | 83.07(11)  |
| O(11)#1-Cu(1)-O(29)   | 91.5(2)    | O(18)#8-Cu(5)-Cu(5)#8 | 83.48(11)  |
| O(10)#2-Cu(1)-O(29)   | 96.78(19)  | O(28)-Cu(5)-Cu(5)#8   | 172.86(13) |
| O(3)#3-Cu(1)-O(29)    | 100.24(19) | C(28)-O(7)-Cu(3)      | 125.7(3)   |
| O(1)-Cu(1)-O(29)      | 94.16(18)  | C(27)-O(5)-Cu(3)      | 124.2(3)   |
| O(11)#1-Cu(1)-Cu(2)   | 86.71(12)  | C(55)-O(13)-Cu(3)     | 122.0(3)   |
| O(10)#2-Cu(1)-Cu(2)   | 85.26(11)  | C(82)-O(19)-Cu(3)     | 123.4(3)   |
| O(3)#3-Cu(1)-Cu(2)    | 85.08(10)  | C(1)-O(2)-Cu(2)       | 118.9(3)   |
| O(1)-Cu(1)-Cu(2)      | 80.54(10)  | C(55)-O(14)-Cu(4)     | 124.2(3)   |
| O(29)-Cu(1)-Cu(2)     | 174.30(15) | C(82)-O(20)-Cu(4)     | 122.5(3)   |
| O(20)-Cu(4)-O(14)     | 89.23(14)  | C(1)-O(1)-Cu(1)       | 126.7(3)   |
| O(20)-Cu(4)-O(8)      | 169.04(14) | C(28)-O(8)-Cu(4)      | 121.5(3)   |
| O(14)-Cu(4)-O(8)      | 89.47(14)  | C(74)-O(16)-Cu(6)     | 119.4(3)   |
| O(20)-Cu(4)-O(6)      | 89.22(13)  | C(111)-O(27)-Cu(6)    | 121.0(6)   |
| O(14)-Cu(4)-O(6)      | 167.96(13) | C(27)-O(6)-Cu(4)      | 121.2(3)   |
| O(8)-Cu(4)-O(6)       | 89.79(14)  | C(81)-O(17)-Cu(5)     | 121.4(3)   |
| O(20)-Cu(4)-O(26)     | 95.71(16)  | C(115)-O(30)-Cu(2)    | 119.6(6)   |
| O(14)-Cu(4)-O(26)     | 95.69(16)  | C(2'A)-O(26)-Cu(4)    | 122.8(7)   |
| O(8)-Cu(4)-O(26)      | 95.25(16)  | C(2'B)-O(26)-Cu(4)    | 120.7(10)  |
| O(6)-Cu(4)-O(26)      | 96.35(16)  | C(113)-O(28)-Cu(5)    | 115.8(5)   |
| O(20)-Cu(4)-Cu(3)     | 84.12(10)  | C(81)-O(18)-Cu(5)#8   | 123.8(3)   |
| O(14)-Cu(4)-Cu(3)     | 83.00(9)   | C(74)-O(15)-Cu(6)#6   | 125.6(3)   |
| O(8)-Cu(4)-Cu(3)      | 84.92(10)  | C(101)-O(23)-Cu(6)#4  | 119.5(4)   |
| O(6)-Cu(4)-Cu(3)      | 84.96(9)   | C(101)-O(24)-Cu(6)#9  | 125.1(4)   |
| O(26)-Cu(4)-Cu(3)     | 178.68(14) | C(108)-O(21)-Cu(5)#4  | 120.7(3)   |
| O(19)-Cu(3)-O(5)      | 88.88(15)  | C(108)-O(22)-Cu(5)#1  | 123.5(4)   |
| O(19)-Cu(3)-O(7)      | 167.75(15) | C(20)-O(3)-Cu(1)#10   | 122.2(3)   |
| O(5)-Cu(3)-O(7)       | 89.75(15)  | C(20)-O(4)-Cu(2)#10   | 124.7(3)   |
| O(19)-Cu(3)-O(13)     | 89.80(15)  | C(47)-O(10)-Cu(1)#2   | 120.9(3)   |
| O(5)-Cu(3)-O(13)      | 169.21(14) | C(47)-O(9)-Cu(2)#2    | 122.7(4)   |
| O(7)-Cu(3)-O(13)      | 89.26(16)  | C(54)-O(11)-Cu(1)#7   | 119.4(4)   |
| O(19)-Cu(3)-O(25A)    | 103.0(4)   | C(54)-O(12)-Cu(2)#7   | 124.5(4)   |



|                    |         |                     |           |
|--------------------|---------|---------------------|-----------|
| O(5)-Cu(3)-O(25A)  | 91.3(6) | C(117)-O(25A)-Cu(3) | 154.5(10) |
| O(7)-Cu(3)-O(25A)  | 89.2(4) | C(117)-O(25B)-Cu(3) | 157.1(8)  |
| O(13)-Cu(3)-O(25A) | 99.4(6) |                     |           |

---

Symmetry transformations used to generate equivalent atoms:

#1  $x-1/2, -y+1/2, z-1/2$     #2  $-x, -y, -z+1$     #3  $-x-1/2, y+1/2, -z+1/2$     #4  $-x+1, y, -z+1/2$   
#5  $x+1/2, -y-1/2, z+1/2$     #6  $-x+3/2, -y-1/2, -z+1$     #7  $x+1/2, -y+1/2, z+1/2$   
#8  $-x+3/2, -y+1/2, -z+1$     #9  $x-1/2, -y-1/2, z-1/2$     #10  $-x-1/2, y-1/2, -z+1/2$

## Section 4. References

1. N. Zhu, D. Sensharma, P. Wix, M. J. Lennox, T. Duren, W.-Y. Wong and W. Schmitt, *Eur. J. Inorg. Chem.*, 2016, 1939-1943.
2. A. P. Nelson, O. K. Farha, K. L. Mulfort and J. T. Hupp, *J. Am. Chem. Soc.*, 2009, **131**, 458-460.
3. G. M. Sheldrick, *Acta Crystallogr., Sect. C: Struct. Chem.*, 2015, **71**, 3-8.
4. A. Spek, *Acta Crystallogr., Sect. C: Struct. Chem.*, 2015, **71**, 9-18.
5. V. A. Blatov, A. P. Shevchenko and D. M. Proserpio, *Cryst. Growth Des.*, 2014, **14**, 3576-3586.
